# Supplementary material for: Divalent later transition metal complexes of the traditional chinese medicine (TCM) liriodenine: coordination chemistry, cytotoxicity and DNA binding studies
Source: Royal Society of Chemistry journal article supplement (doi:10.1039/b912553a), 2009-01-01
Supplement: b912553a.pdf [file b912553a.pdf]

## Supplementary Materials

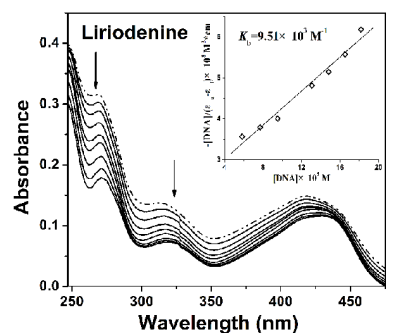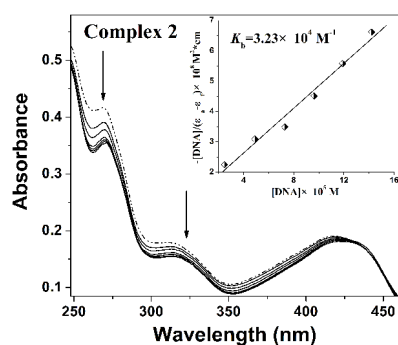

Fig.S1 UV-Vis absorption spectra of liriodenine (**L**) and complex **2**, **3** in the absence (dashed line ----) and presence (solid line —) of ct-DNA with increasing concentrations.

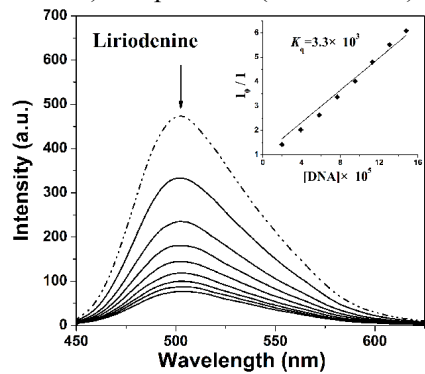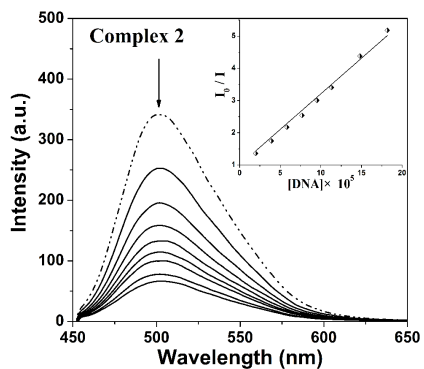

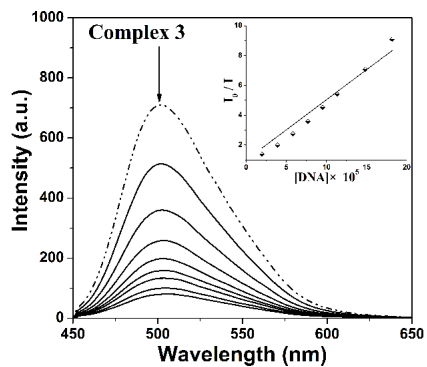

Fig.S2 Fluorescence emission spectra of **L** and complex **2**, **3** in the absence (dashed line ----) and presence (solid line —) of ct-DNA with increasing concentrations

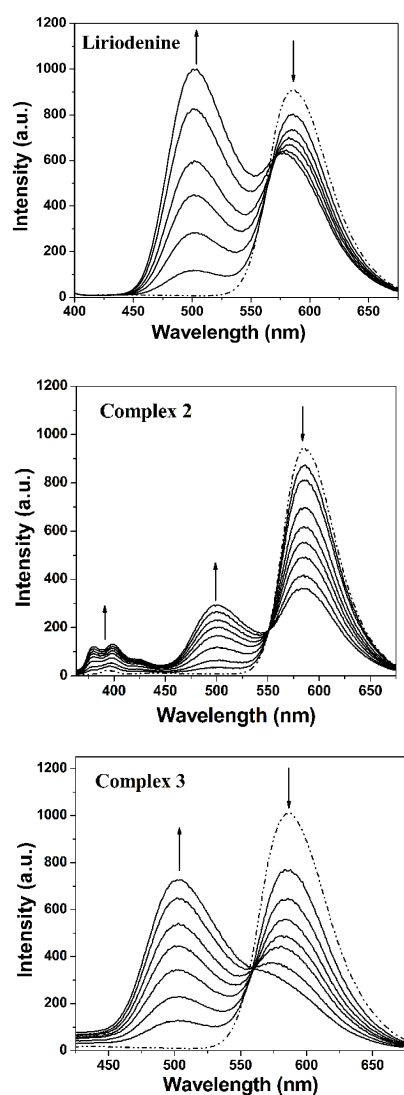

Fig.S3 Fluorescence emission spectra of EB binding with ct-DNA in the absence (dashed line ----) and presence (solid line —) of **L** and complex **2**, **3** as competitive agents.

Table S1 Inhibition rate of four metallic salts as starting materials against 10 tumor cell lines

|                                      | Inhibition rate (%) <sup>a</sup> |        |       |        |         |       |         |       |       |        |
|--------------------------------------|----------------------------------|--------|-------|--------|---------|-------|---------|-------|-------|--------|
|                                      | CNE1                             | CNE2   | HT29  | HCT116 | NIC-460 | 7860  | BEL7404 | HePG2 | MCF-7 | MGC803 |
| MnCl <sub>2</sub> ·4H <sub>2</sub> O | -4.63 <sup>b</sup>               | 14.12  | 14.65 | 15.43  | 12.45   | 9.72  | 1.92    | 15.65 | 18.15 | 39.25  |
| FeCl <sub>2</sub> ·4H <sub>2</sub> O | -32.57                           | -52.45 | 24.38 | 40.93  | 7.29    | 12.81 | 47.06   | 48.81 | 36.36 | 2.38   |
| CoCl <sub>2</sub> ·6H <sub>2</sub> O | 81.11                            | 21.75  | 41.88 | 40.57  | 7.01    | 25.31 | 28.94   | 48.23 | 46.7  | 40.7   |
| ZnCl <sub>2</sub>                    | 21.60                            | 34.90  | 23.63 | 20.32  | 10.11   | 25.26 | 28.16   | 26.96 | 36.91 | 43.67  |

<sup>a</sup> Inhibition rates of all metallic salts were identically tested at 10 µg/mL;

<sup>b</sup> negative value means no cell growth inhibition, but refers to cell growth promotion rate.
